# Supplementary material
Source: Springer Nature journal article supplement (https://www.springermedizin.de/resource/supplementary/12936_2009_1084_MOESM5_ESM.pdf/9549662)

Residual Ab OD after immunodepletion

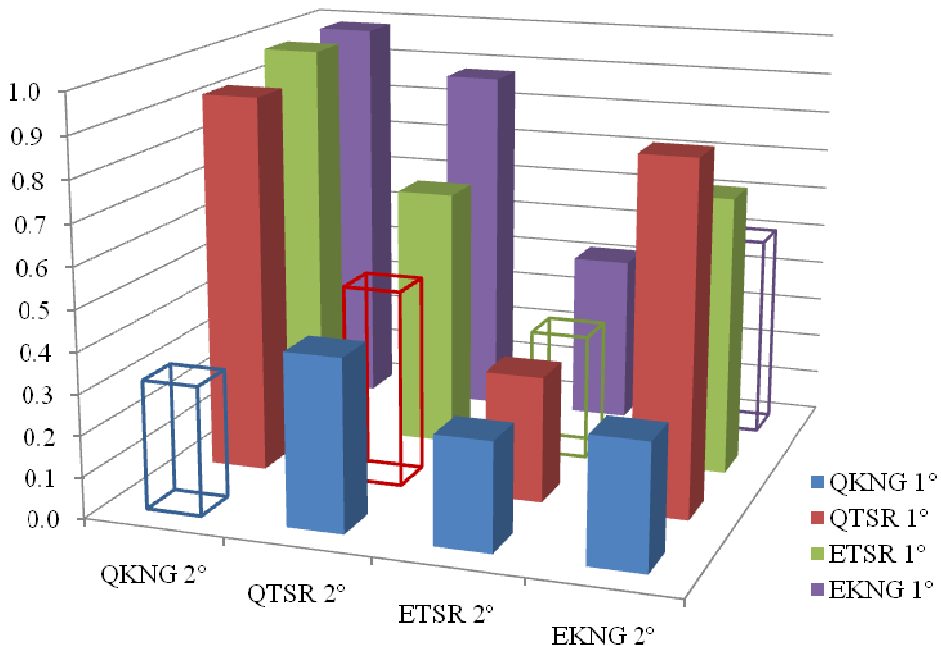

Supplement: MOESM5 [file 9549662]
